1 **Patterns of discursive interactions between students and teachers in the biology learning**  
2 **process in High school: the use of social media**

3

4 Scarlet Ferreira de Souza.<sup>1</sup>; Bárbara Rodrigues Cintra Armellini<sup>3</sup>; Alexandre La Luna<sup>2,3</sup>; Ana  
5 Carolina Ramos Moreno.<sup>3</sup>; Martha Cristina Motta Godinho Netto<sup>1</sup>; Rita de Cássia Café Ferreira.<sup>3</sup>;  
6 Flávio Krzyzanowski Júnior \*<sup>1,3</sup>

7

8 <sup>1</sup> Instituto Federal de Educação, Ciência e Tecnologia de São Paulo, São Paulo, SP, Brazil

9 <sup>2</sup> Instituto Federal de Educação, Ciência e Tecnologia de São Paulo, Sorocaba, SP, Brazil

10 <sup>3</sup> Vaccine Development Laboratory, Department of Microbiology, Institute of Biomedical Sciences,  
11 Universidade de São Paulo, São Paulo, SP, Brazil

12 **\*Corresponding author:** Flávio Krzyzanowski Júnior. Instituto Federal de Educação, Ciência e  
13 Tecnologia de São Paulo, São Paulo, SP, Brazil. Vaccine Development Laboratory, Department of  
14 Microbiology, Institute of Biomedical Sciences II, Universidade de São Paulo. Phone: +55 11 3091-  
15 7356; Fax: +55 11 3091-7354; E-mail: [fkjuniormeister@gmail.com](mailto:fkjuniormeister@gmail.com)

16 **Running Title:** Biology learning process using social media

17 **Keywords:** Facebook, learning process, biology, high school, microbiology education

18 **Conflict of interest disclosure:** The authors declare no conflicts of interest.

19 **Abstract**

20

21 *Increasingly, blending teaching has become a reality in a generation where the digital language is*  
22 *present in virtually every activity. In addition to allowing greater independence and encouraging*  
23 *students to learn at their own pace, blending teaching allows the student to easily access reliable*  
24 *information quickly. Therefore, new studies related to active learning methodology are fundamental.*  
25 *In this study we analyzed 69 interactions between high school students and their teachers in a biology*  
26 *learning activity using a social networking site and the methodology proposed by Mortimer and Scott.*  
27 *The results showed that the prior knowledge of students as well as questions posing challenges and*  
28 *problems to be solved, a very important approach in learning Science Methodology, were barely*  
29 *explored by teachers and mediators (17% and 1%, respectively). Our data demonstrated that the use*  
30 *of digital technology alone does not guarantee interactions that contribute to the learning process in*  
31 *the field of natural sciences. Proposals were also discussed so that these interactions become more*  
32 *diversified and interesting for students, arousing interest in research and promoting the knowledge*  
33 *of scientific methodology.*

## 34 **Introduction**

35

36 Internet access has been growing on a daily basis, both in Brazil and throughout the world.  
37 From 2015 through 2017, a United Nations research showed an increase in the use of Broadband  
38 Internet in the world, where countries such as Brazil, India, and China accounted for approximately  
39 70% of the access [20]. Brazil is the 4th in Internet access and 3rd in terms of time spent accessing  
40 the net, according to the website “we are Social” (<https://wearesocial.com/>). Interestingly, about 62%  
41 of the Brazilian population is connected to social networks, which demonstrates its great importance  
42 in the national territory. Of all social networking websites, Facebook® stands out with around 2.3  
43 billion users worldwide, with 127 million in Brazil, according to data from the site itself. Therefore,  
44 the Internet needs to be considered when thinking about Brazilian education, and specifically, the use  
45 of social media, such as Facebook®, can be of great value in the development of educational activities.

46 Regarding this matter, there is a methodology known as Blending Teaching, which mixes  
47 traditional classes with the use of virtual environment. In this teaching approach, the main focus  
48 ceases to be the teacher, and students become responsible for their learning [1]. This methodology  
49 has been studied and debated for a long time, being inserted, in 2003, among the ten main research  
50 trends in teaching, revealing its innovative role, inserting the virtual environment in the student  
51 learning process [3]. It is important to point out that in the Blending-teaching approach the teacher  
52 becomes a mediator of the teaching-learning process, guiding students in the search for answers,  
53 encouraging them to "learn to learn", which was considered by Delors [11] as one of the pillars of  
54 education of the 21st century. Nevertheless, most teachers do not use digital technology in their  
55 classroom activities [9], which is reflected in the National Curriculum Parameters [7], where digital  
56 technologies are seen as merely a tool to assist the individuals in their daily activities. The same can  
57 be observed with the National Common Curricular Base (NCCB), launched in 2017 by the Ministry  
58 of Education [5]. A research conducted in 2011 showed that about 80% of Brazilian schools had  
59 computer labs, but only 22% of teachers used this technology. By 2014, the number of teachers using  
60 technology had more than doubled (46% [6]). Despite all this scenario, little is discussed about the  
61 use of the Internet in Science Teaching, and even less in Microbiology teaching. Regarding  
62 Microbiology, this field of science is acknowledged to have great influence in the flow of life and,  
63 therefore, it is important to point out to students how they can benefit from the study of microbiology  
64 [8]. News related to microorganisms usually reflects their negative side, such as diseases, which  
65 makes students fear these living beings [19]. The current activities and materials proposed in the  
66 classroom may not fully collaborate, since the information can be so abstract that it leads to learning  
67 difficultly. Therefore, the use of technologies may help, making the approximation of the micro and  
68 macroscopic world possible, establishing relations of cause and effect between them [12].

69 A project entitled “Adopt a Bacteria” [4], which aimed to teach Microbiology in Higher  
70 Education, was developed at the Institute of Biomedical Sciences of the University of São Paulo  
71 (ICB-USP), in the Microbiology department. Authors used Facebook® as a tool for undergraduates  
72 to post articles, videos and news on previously chosen microorganisms [16]. Given the positive results  
73 obtained in Higher Education, this approach was applied in the discipline of Biology in High School,  
74 expanding the repertoire of microorganisms used (including viruses and fungi), with the name of  
75 "Adopt a Microorganism". The impact of the expansion of the classroom to a virtual environment in  
76 teacher-student and student-student interactions as a fundamental base for the teaching and learning  
77 process has not yet been analyzed in the literature [21]. It would be possible to assume that the patterns  
78 of discursive interaction established in social networking sites would present their own quality and  
79 dynamics since space and time are used by teachers and students in a different way from what  
80 occurred in the classroom. Thus, the present work seeks to verify the interaction patterns of the  
81 activity "Adopt a Microorganism" in a class of 2nd year of High School at the Technical Teaching in  
82 Integrated Mechanics of the Federal Institute of São Paulo, in order to analyze if the use of social  
83 media as a learning tool guarantees the quality of the interactions, using the analytical approach  
84 proposed by Mortimer and Scott [15].

85

## 86 **Study Design**

87 This study was performed at the Federal Institute of Education, Science, and Technology of São  
88 Paulo, Campus São Paulo (IFSP) with students from the 2nd year of Technical Education in  
89 Mechanics as part of the Biology discipline. The project "Adopt a Microorganism" was carried out  
90 during the third quarter of the 2016 school year, with the voluntary participation of 18 students. The  
91 study design was performed according to Piantola et al, 2018, as summarized in Figure 1.

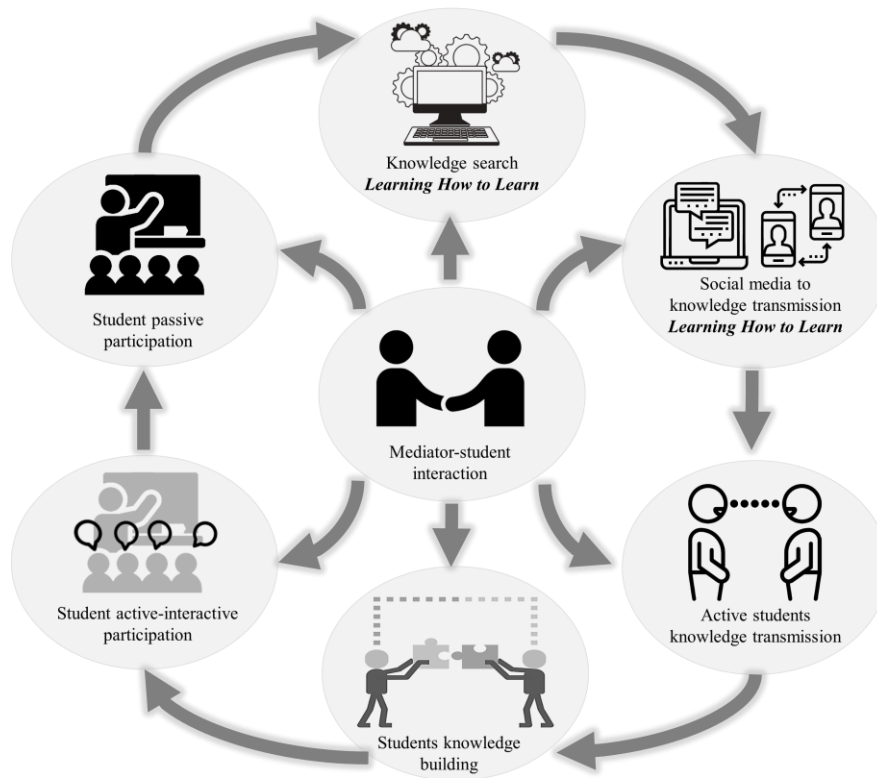

92

93 **Figure 1. Study design.** The educational approach of the “Adopt a Microorganism” is based on four  
94 pillars: teacher, mediators, students, and social media

95

96 The students of Technical Education in Mechanics were divided into six different groups and  
97 each group “adopted” a microorganism (Table 1). Different from those authors who addressed only  
98 bacteria, in our study we approached different types of medically important microorganisms. The role  
99 of teachers in this system was, apart from conducting the presential classes, also to create challenging  
100 questions in order to guide the students through the discussions on Facebook. Every week teachers  
101 posted a new challenging question about the adopted microorganism. Each student needed then to  
102 answer the question and comment on the posts of colleagues during that week. Students then began  
103 to post their own comments about the adopted microorganism. In this scenario, mediators, who were  
104 students of graduation in Biology also from the Federal Institute of Education, Science, and  
105 Technology of São Paulo had the important and essential role of assisting students in their posts,  
106 asking questions and providing the enrichment of the thematic discussions. Consequently, students  
107 interacted with both mediators and colleagues, generating a teaching-learning environment where  
108 students were the protagonists. Teachers also participated in discussions. Therefore, students began  
109 to interact better with their teachers and their classmates, leading to active participation. In this study,  
110 only the interactions of one group were analyzed (HIV, with 18 students), and this group presented  
111 the biggest number of interactions on Facebook® discussions (69 in total) when compared to the other  
112 five groups.

113

114 Table 1 – Addressed microorganisms and related topics

| Microorganism              | Subject to be addressed                 |
|----------------------------|-----------------------------------------|
| Lactobacillus spp          | Importance in the microbiota            |
| Mycobacterium tuberculosis | Pathogenesis                            |
| Pseudomonas aeruginosa     | Bioremediation of contaminated areas    |
| HIV                        | Impact on immune system                 |
| Zika Virus                 | How Zika virus causes microcephaly      |
| Saccharomyces cerevisiae   | The different industrial uses of yeasts |

115

116

### 117 Study development

118 For the development of this project, some undergraduate students of the Biological Sciences  
119 Degree of the IFSP were invited to mediate discussions on Facebook®. Before the virtual activities  
120 started, the mediators held a workshop with the students to explain how to use reliable sources of  
121 scientific information on the internet. Additionally, there were things which were strongly forbidden,  
122 such as: offense and criticism of participants, political, sports and religious comments, exposure of  
123 personal data and personal matters, inappropriate photos and videos, spams and advertisements.  
124 Students, teachers and mediators were instructed to carry out the project activities in their personal  
125 electronic devices and private accounts. In addition, during the first week of the project some  
126 meetings were held between the students and the teachers in order to clear some doubts about the  
127 activities. More importantly, since the use of social media involves the exchanging of personal  
128 opinions, which, in turn, might generate unwanted exposure, the entire project was held in a  
129 Facebook® secret mode group, in which only the accepted members could visualize its contents. At  
130 the end of the project, the students developed publicity material (Posters) regarding their adopted  
131 microorganism. These posters were further presented to all communities of the IFSP. Another  
132 important role of teachers was to evaluate these posters and the individual participation of the students  
133 in the discussions on Facebook® in order to determine a final grade.

134

### 135 Data analysis

136 In order to understand the different patterns of discursive interactions in social media among  
137 students, mediators and teachers in the biology learning process, we used as reference the tool  
138 developed by Mortimer and Scott [14]. Using their approach, we evaluated a triad of analytical  
139 structures: Professor/Mediators Intentions, Communicative Approach and Discursive Interactions  
140 Patterns, considering these subjects to be the most significant when related to the development of the  
141 scientific language and the quality of the interactions performed by the students (Table 2). We also

142 evaluated four types of communicative approach (Table 3) and nine discursive patterns of interactions  
 143 (Table 4).

144 With regard to discursive interaction patterns, some adaptations were necessary, since  
 145 Mortimer and Scott [14] concentrated their attention only in the classical classroom .Thus, in the  
 146 context of virtual environment, new categories of interaction were required. One of these new  
 147 categories was “Like Assessment” (LA). Like assessment is present only on Facebook and it is not  
 148 present in oral interactions. Another adapted category was “Students Initiative” (SI), since the  
 149 initiative of students was present in this study and had not been predicted in Mortimer and Scott’s  
 150 model.

151 In Figure 2 we have an example of the analytical method used to asses the discussions in  
 152 Facebook® regarding Mortimer and Scott’s approach. For the other categories, the 69 interactions  
 153 were analyzed following the pattern shown in Figure 3.

154  
 155 Table 2 – Analytical Structure of the Research Study

| Study Purpose                 | Related Subject                                     |
|-------------------------------|-----------------------------------------------------|
| Focus of the learning process | Professor intentions<br>Didactic content            |
| Types of Approach             | Communicative<br>Approach                           |
| Types of Action               | Patterns of interaction<br>Professor's intervention |

156  
 157  
 158 Table 3 – Types of communicative approach

| Communicative Approach          | Definition                                                                                                            |
|---------------------------------|-----------------------------------------------------------------------------------------------------------------------|
| Interactive / Dialogical        | Teacher and students explore and make inquiries about relevant and important issues, from different points of view.   |
| Non-interactive / Dialogical    | In his speech, teacher reconsiders various points of view, highlighting similarities and differences.                 |
| Interactive / Authority         | Teacher usually leads students through a series of questions and answers, in order to reach a specific point of view. |
| Non-interactive / Authoritative | Teacher presents a specific point of view.                                                                            |

159  
 160  
 161 Table 4 – Discursive Interaction Patterns: Types of actions in student-mediator interaction

| <b>Initials</b> | <b>Meaning</b>                                                             |
|-----------------|----------------------------------------------------------------------------|
| I               | Professor/Mediator's initiative                                            |
| SI              | Student's initiative                                                       |
| SA              | Student's answer                                                           |
| PF              | Professor/Mediator's feedback in order to students elaborate more comments |
| DA              | Discursive action that allows continuation of student's comments           |
| PE              | Professor/Mediator's evaluation                                            |
| LA              | Professor/Mediator's Like Assessment                                       |
| RD              | Restarting discussion                                                      |
| UR              | Unrelated response                                                         |

162

163



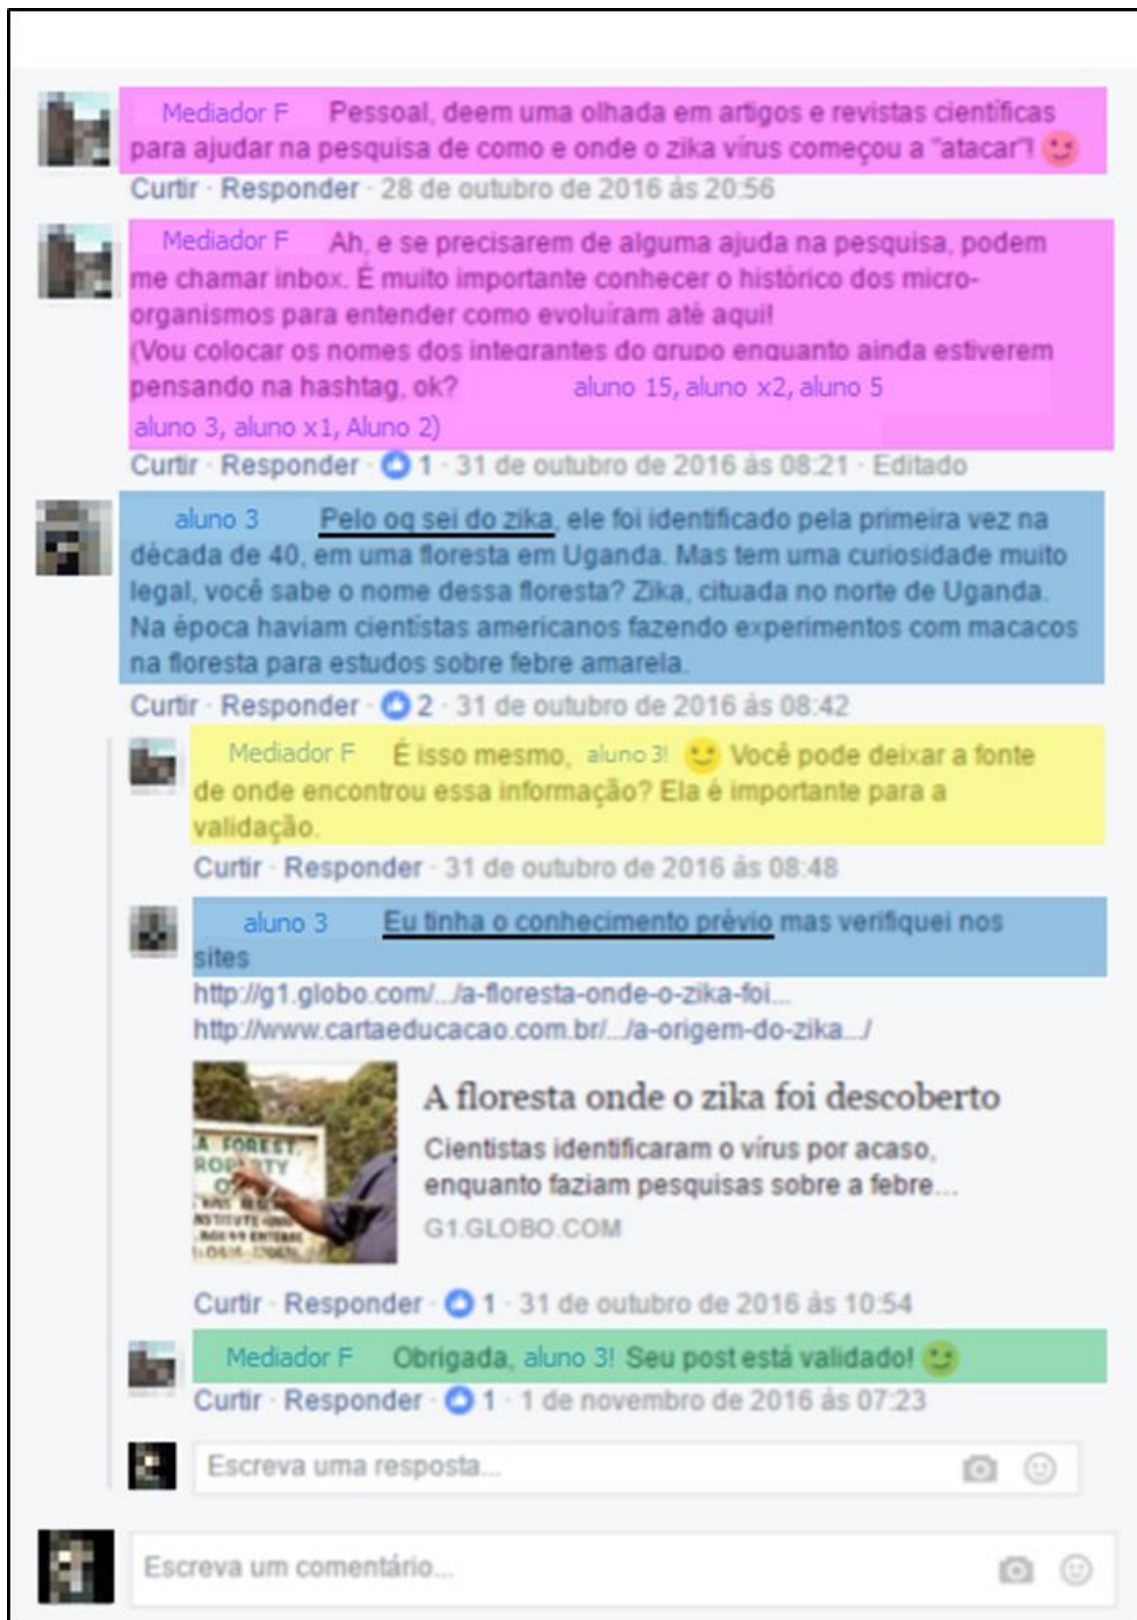

164

165 **Figure 2.** Analytical method used to asses the Discursive Interaction Patterns in Facebook® regarding  
166 Mortimer and Scott's approach. Different colors were used to characterize the 69 different discursive  
167 interaction patterns. In this example: Pink represents restarting discussion (RD); Blue, student's  
168 answer (SA); Yellow, discursive action that allows continuations of student's comments and Green,  
169 Professor/Mediator evaluation (PE). Below we present the translation into English:

170 Mediator F students, take a look at some articles in the scientific magazines to help you to search how and  
 171 where the zika virus started to spread.

172 Mediator F if you need any more help with the research, fell free to inbox me. It is very important to know  
 173 the history of the microorganism in order to understand how they evolved until today (I will put the names  
 174 of the members of the group while you think of a hastag, ok?)

175 Student 3 As far as I know about the zika virus, it was identified for the first time in the 40s, in a forest in  
 176 Uganda. And here is something very curious, can your guess the name of this forest? Zika, located in the  
 177 north of Uganda. At that time, American scientists were doing experiments on monkeys for a research  
 178 about the yellow fever

179 Mediator F. That's right student 3. Can you tell us the source where you got this information? It is  
 180 importante for the validation of your answer.

181 Student 3 I had prior knowledge but I checked on the websites.

182 Mediator F Thanks studant 3! Your post has been validated!

183

184

185 Post 1

|                                 |                                 |
|---------------------------------|---------------------------------|
| Professor/ Mediator intention   | To create a problem             |
| Didactic content                | HIV                             |
| Communicative approach          | Interactive - Authority         |
| Discursive interaction patterns | I - SA1- SA1 - I                |
| Professor/Mediator intervention | To select students' conceptions |

186

187 Figure 3. An example of the pattern used to analyse the 69 interactions obtained from Facebook®.

188 Only three categories were discussed in this study: Professor/ Mediators Intention, Communicative

189 Approach and Discursive Interaction Patterns.

190 **Results**

191

192 To evaluate the intentions of teachers and mediators during the learning activity on  
193 Facebook®, the interactions were classified according to the tool developed by Mortimer and Scott  
194 [14]. We observed that the items “created problems” and “explore the vision” were little used (1%  
195 and 17%, respectively) (Fig. 4). “Keeping the narrative” was the most common intention (81%),  
196 evidencing that the intention "creating a problem" was little explored (1%) by professors and  
197 mediators. It is noteworthy that this intention (creating a problem) is pivotal in science education.

198

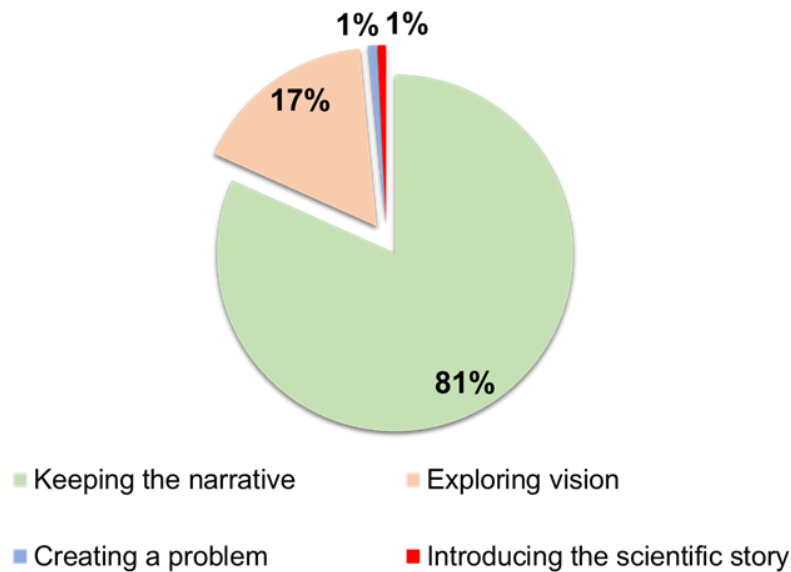

199

200 Figure 4. Types of intentions of the discursive action from teachers or mediators.

201

202 Regarding the communicative data analysis, most of the interactions were short (I-SA-PE-  
203 LA/ I-SA-PE/ SI-SA-PE) (Fig.5), consequently preventing discussions in which the topics that were  
204 studied could be deepened, or the prior knowledge of students could be explored. It is important to  
205 note that the most appropriate interaction pattern for the student learning process was the least  
206 explored by teachers and mediators during the teaching activity (I-RD-SA-PE-DA, 2%).

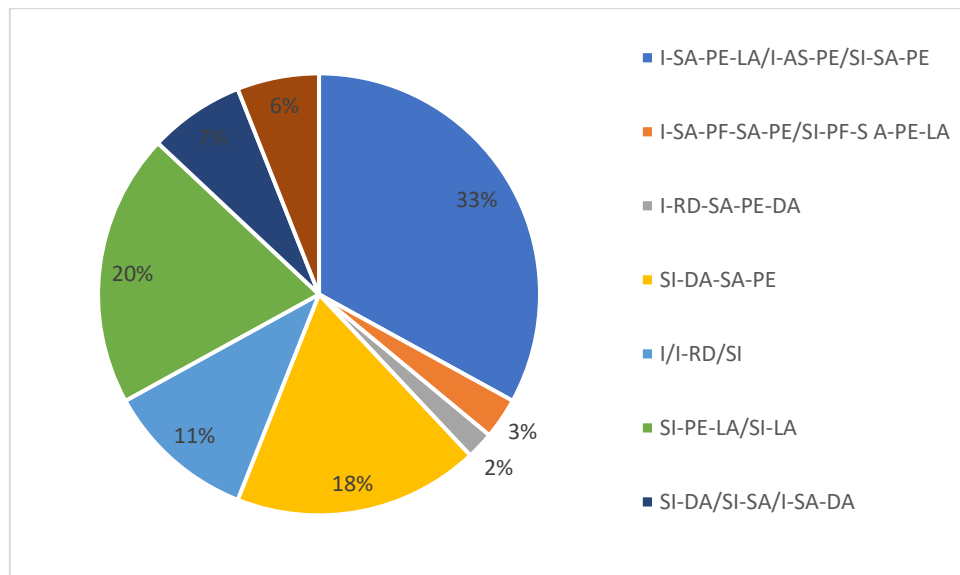

207

208

209 Figure 5. Distribution of the communicative approach found in the 69 interactions among teachers,  
210 mediators and students.

211

## 212 Discussion

213 In this study we used a discursive interaction analysis tool, created by Mortimer and Scott  
214 [15], to evaluate the interactions that occurred in a social networking site during high school biology  
215 teaching. In the project “Adopt a Microorganism”, Facebook © was chosen to make teaching viable  
216 with a Blending approach [1]. In this approach, actions are taken consciously to allow  
217 individualization of teaching. The teacher, seen as the only source of knowledge in traditional  
218 teaching, starts to act more as a mediator of the learning process. Activities in which students are  
219 protagonists of their own learning are encouraged. One of such activities is encouraging discussions  
220 of previously studied items among students during classes.

221 The social networking site helped promote dialogue and interaction among students and  
222 teachers/mediators in a collaborative construction of knowledge. This aspect was also commented by  
223 Rabello [17], who also used the Facebook® platform in English language teaching, and analyzed the  
224 dynamics of the activity from the socio-historical conceptions of Vygotsky and Bakhtin.

225 Although the results show that the use of social media allowed students to interact with one  
226 other and with the mediators, Mortimer’s tool demonstrated that several adjustments need to be made  
227 in the next versions of the project in order to make the interactions more effective. Furthermore,  
228 important elements of scientific language such as argumentation, hypothesis gathering and problem-  
229 solving should be more elaborated during the discussions. We will, at this point, elucidate points that  
230 need to be adjusted.

231 With regard to the intentions of the professor/mediators (Fig. 4) we noticed that the items  
232 “created problems” and “explore the vision” were little used (1% and 17%, respectively). These  
233 intentions are essential when we speak of science teaching. Being aware of the prior knowledge of  
234 the student is fundamental in teaching practice because it enables the teacher to draw action plans for  
235 the acquisition of knowledge up to the level previously intended by the teacher [22].

236 In Bloom’s scale, problem-solving composes the higher levels that allow for more  
237 meaningful learning, preparing the student to solve problems by applying the knowledge gained in  
238 practical questions [10].

239 Considering the types of communicative approaches, the interactive/authority pattern was the  
240 most prevalent, being found in 66 of the 69 interactions (data not shown). This pattern reveals the  
241 intention of the mediator or teacher to reach a pre-determined target without taking into consideration  
242 the different points of view of the students. This obtained pattern could be explained by the fact that  
243 students' previous knowledge was not explored, as shown in figure 2, where the exploring vision item  
244 was not very representative (17%).

245 Mortimer suggests that the approaches should vary, allowing both the mediators and the  
246 students to have an active voice in the interactions. Vygotsky [21] states that learning occurs in  
247 interactions. Therefore, the more space is given for students to express their opinions, the longer  
248 they will have to talk to one other and search for information themselves in reliable sources other  
249 than teachers. In so doing, there will be a great contribution in order to reach the variations suggested  
250 by Mortimer.

251 Taking into account the communicative approaches (Fig. 5), we observed that most of the  
252 discussions were initiated by students, making the adaptation of pattern I necessary (Initiator of the  
253 mediator), including the new term SI (Student Initiation). The student's initiation was also described  
254 in other works that used this tool, such as that of Rezende and Ostermann [18] who carried out  
255 research in an online discussion forum, and also in the work of Mortimer et al [14], carried out in the  
256 classroom. The initialization of speech by students occurred in fifty-eight (58) dialogic interactions  
257 during the project, corresponding to eighty-four percent (84%) of the initiations.

258 This fact is relevant because it can signal the interest of the student in the subject being  
259 addressed as well as in the use of the tool. We can still explore the fact, already observed by other  
260 authors, that students who do not manifest themselves in classrooms participate more when meetings  
261 occur outside this environment [12]. This finding is very important because it shows that some  
262 students begin to interact better in extra-class environments.

263 Other adjustments, besides the establishment of speech shift SI (student initiation), were  
264 necessary for the tool, considering it was created to analyze face-to-face interactions and not  
265 asynchronous virtual interactions. One of these adjustments was to institute the acronym LA (like  
266 assessment), which was the evaluation given when a professor/mediator accepted what had been  
267 published, and the initials RD (restarting discussion) since, unlike a face-to-face lecture, the  
268 discussion could restart hours after a post.

269 Mortimer and Scott [15] indicate that the most common interaction patterns are the triads I-  
270 SA-PE (professor/mediator's initiation, student answers, professor/mediator's evaluation) that  
271 emerge from the alternation of mediator-student speech. As exposed in figure 3, this pattern of  
272 classical interaction was evidenced in only fifteen (15) interactions of a total of eighty-four (84)  
273 interactions in the sixty-nine (69) postings. However, when I-SA-PE-SI, SI-AS-PE or I-SA(n)-PE are  
274 considered to be I-AS-PE derived patterns, the variation of the number of student responses before  
275 the mediator evaluation is evident: twenty-eight (28) publications with these interactive standards  
276 corresponding, therefore, to thirty-three percent (33%) of the interactions, that is, 33% of the  
277 interactions gravitated on the I-AS-PE triad and its variations. These patterns, which are very common  
278 in a traditional classroom, show mechanistic participation of the student, and it is then assumed that  
279 only through an expositive class, where students should answer questions made by teachers, can they  
280 learn.

281 Rarely did mediators provide feedback for students demanding that they elaborate their  
282 answers a little more. The interaction patterns I-SA-PF-SA-PE or SI-PF-SA-PE-SI appeared only  
283 twice during the activity, representing only three percent (3%) of interactions of this type. The scarcity  
284 of these patterns highlights the fact that mediators were not willing to prolong the discussions,  
285 contributing to the impoverishment of the interactions and, consequently, less learning. This would  
286 be an important opportunity for mediators to propose the development of argumentation and the  
287 resolution of a real problem, using questions that would challenge their prior knowledge.

288 The second most expressive interaction pattern corresponded to the speech shifts, when the  
289 student started a discussion and soon after the mediator evaluated the content of the student's speech.  
290 This interaction was expressed by the acronym SI-PE-LA (students initiative, professor/mediators  
291 evaluation, like assessment) or SI-LA, and represented twenty percent (20%) of the total interactions.  
292 The student initiation (SI) followed by a professor/mediator evaluation (PE) without the interaction  
293 of the other students involved in the project may indicate a low interaction rate in this percentage of  
294 postings.

295           Actions aimed at lowering this pattern are essential in order to increase interactivity. An  
296 important suggestion would be for the evaluation to occur after a long discussion. Another suggestion  
297 would be to involve other students in ongoing discussions, so that interactions are enriched with the  
298 greater participation of students

299           The data show that only the use of a technological tool, by itself, does not guarantee that  
300 important elements in the teaching-learning process, such as the variation of the interactions and their  
301 quality, occur naturally [2]. From the point of view of science teaching and its language, the same  
302 was observed. This implies that teachers should be trained not only for the use of new technological  
303 tools but also for the pedagogically effective use of them.

304           Having all that was presented in mind, we emphasize that the items that need to be better  
305 worked with the professor and mediators in the next versions of the project “Adopt a Microorganism”  
306 should be: prolonging discussions with students, so as to find out more about their previous  
307 knowledge; a greater variation of interactions, leading to students being able to express their opinions  
308 and hypotheses more freely; increasing the use of speech shifts DA (discursive action that allows  
309 continuation of student’s answers) and PF (professor/mediator’s feedback), which would allow  
310 mediators to present problems in which students would have to apply the acquired knowledge; finally,  
311 the extension of the evaluation PE (professor/mediators evaluation) and LA (like assessment) by the  
312 professor/mediators. When these goals are achieved, an environment of richer interactions will be  
313 provided.

314           We believe that training mediators to work with the skills and competencies related to the  
315 development of argumentation, as well as solving problems, would be a great contribution for the  
316 natural enrichment of discussions, as well as developing the scientific language in students.

317

318 **References**

319

320 1.Bacich L, Neto AT et al (2015) Ensino híbrido: personalização e tecnologia na educação. Penso  
321 Editora. Porto Alegre.

322

323 2.Barroqueiro CH, Bonici R et al (2000) O uso das tecnologias de informação e comunicação no  
324 ensino de ciências e matemática: uma bênção ou um problema? Encontro nacional de pesquisa em  
325 educação em ciências. Florianópolis.

326

327 3.Bonk J, Graham CR (2012) The handbook of blended learning: Global perspectives, local designs.  
328 John Wiley & Sons

329

330 4.Botte DAC, Souza RD et al (2014) Microbiologia no ensino superior: “adote uma bactéria!” (e o  
331 facebook©)!. Microbiologia In Foco. Rev Microbiol São Paulo, v. 23, p.5-9, Ano 5

332

333 5.Brasil (2017) Base Nacional Comum Curricular. Brasília: Ministério da Educação.

334

335 6.Brasil (2014). INEP. Instituto Nacional de Estudos e Pesquisas Educacionais Anísio Teixeira.  
336 Brasília: Ministério da Educação.

337

338 7.Brasil (1999) Parâmetros Curriculares Nacionais. ensino médio. Brasília: Ministério da Educação.

339

340 8.Cassanti AC, Araújo EE et al (2008) Microbiologia democrática: estratégias de ensino-  
341 aprendizagem e formação de professores. Revista Conhecer, v. 9, n. 1, p. 84-93

342

343 9.Corrêa HT, Dias D (2016) Multiletramentos e usos das tecnologias digitais da informação e  
344 comunicação com alunos de cursos técnicos. Trab Linguist Apl vol.55, n.2, pp.241-262

345

346 10.Crowe AD, Wenderot NP (2008) Biology in Bloom: Implementing Bloom's taxonomy to enhance  
347 student learning in Biology. CBE Life Sci Educ Vol (7): 368-381



348

349 11.Dellors J et al (1999) Educação: um tesouro a descobrir: relatório para a UNESCO da Comissão  
350 Internacional sobre Educação para o Século XXI. Educação: um tesouro a descobrir: relatório para a  
351 Unesco da Comissão Internacional sobre Educação para o Século XXI

352

353 12.Grosseck G, Bran R et al (2011) Dear teacher, what should I write on my wall? A case study on  
354 academic uses of Facebook. Procedia Soc Behav Sci 15: 1425–1430

355

356 13.Kimura AH, Oliveira GS et al (2013) Microbiologia para o ensino médio e técnico: contribuição  
357 da extensão ao ensino e aplicação da ciência. Revista Conexão UEPG, v. 9, n. 2, p. 254-267

358 14.Mortimer et al. (2007) Uma metodologia para caracterizar os gêneros de discurso como tipos de  
359 estratégias enunciativas nas aulas de ciências. In: NARDI, R. (Org.). A pesquisa em ensino de  
360 ciências no Brasil: alguns recortes. São Paulo: Escrituras. p. 53-94.

361

362 15.Mortimer E F, Scott P H (2002) Atividade discursiva nas salas de aula de ciências: uma ferramenta  
363 sociocultural para analisar e planejar o ensino. Investigações em Ensino de Ciências, Porto Alegre, v.  
364 7, n. 3, p. 283-306.

365

366 16.Piantola M A F et al (2018) Adopt a Bacterium – an active and collaborative learning experience  
367 in microbiology based on social media. Braz J Microbiol vol.49, n.4, pp.942-948.

368

369 17.Rabello C R L (2015) Interação e aprendizagem em Sites de Redes Sociais: uma análise a partir  
370 das concepções sócio-históricas de Vygotsky e Bakhtin. Rbla, Rio de Janeiro, v. 15, n. 3, p.735-760.

371

372 18.Rezende F, Ostermann F (2006) Interações discursivas on-line sobre Epistemologia entre  
373 professores de Física: uma análise pautada em princípios do referencial sociocultural. Revista  
374 Electrónica de Enseñanza de las Ciencias, v. 5, n. 3, p. 505-521.

375

376 19.Sockett Liz (2001) Microbiology-A lifetime's education. Microbiology Today, v. 28, p. 51-51

377

378 20.United Nations (Org.). Information Economy Report (2017): Digitalization, Trade and  
379 Development. Nova Iorque e Genebra: United Nations, p. 111

380

381 21.Vygotsky L S A (1991) Formação social da mente: o desenvolvimento dos processos psicológicos  
382 superiores. 4ª ed. São Paulo: Martins Fontes.

383

384 22.Zabala A (1998) A prática educativa: como ensinar. São Paulo. Ed. Artmed.

385
